# Supplementary material for: Haplocauda, a New Genus of Fireflies Endemic to the Amazon Rainforest (Coleoptera: Lampyridae)
Source: MDPI journal article supplement (doi:10.3390/insects13010058), 2022-01-05
Supplement: s1 [file s1]

**Supplementary Material S1.** Material examined of the outgroup taxa.

**Amydetinae**

*Amydetes fastigiata*. **Brazil.** Rio de Janeiro. Niterói (São Francisco), 1 male, 24.VI.2012, E. Matos, col. (DZRJ)

**Psilocladinae**

*Psilocladus miltoderus*. **Brazil.** Amazonas. Manaus, Reserva Ducke, 9.ix.1986, 1 male, B.C. Klein col. (INPA).

**Lampyrinae**

*Costalampys tricolor*. Holotype: BRAZIL: 1♂, #292 (MNHN, col. Gorham; formerly in col. Chevrolat col). Other material examined. BRAZIL: Minas Gerais: 1♀, Bocaina de Minas, Ribeirão Santa Casa, prox. Cachoeira da Raposa, 22°18'24.7"S, 44°33'54"W, 1294 m, M&M col. (DZRJ); 1♀, Itajubá, R.B.M. Serra dos Toledos, coleta diurna, 08.XI.2015, Rosa & Ladenthin col. (DZRJ); 1♂, 16.II.–17.III.2017, Rosa & Lopes col. (DZRJ); 1♀, São Roque de Minas, P.N. Serra da Canastra, Malaise trap, Mata ciliar, Ponto 1, 3♂, 14–19.XII.2013, Melo & Rosa col. (DZRJ). Rio de Janeiro: 1♂, Angra dos Reis, PE Ilha Grande, Malaise trap, P450A (23°08'47.2"S, 44°11'09.4"W), 441 m, IX.2017, L. Campello, L. Silveira & R. Queiroz col. (DZRJ); 1♀, Itatiaia, P.N. Itatiaia, PENSARIOP2 (22°25'59.6"S, 44°37'39.7"W, 1280 m), Malaise trap, I.2015, R. Monteiro col. (DZRJ); 1♂, 1♀, Teresópolis, P.N. Serra dos Órgãos, 03–05.XI.2014, 1200 m, active search [afternoon], L. Silveira col. (DZRJ). Paraná: 1♂, Curitiba, 28–XII.1976, V. Graf col. (DZUP); 1♂, Curitiba, 12.69, Mielke col. (DZUP); 1♀, Tijucas do Sul, Vossoroca, 25.I, Pe. Moure & Marinoni col. (DZUP); 1♀, Ponta Grossa, Jardim Carvalho, 25°4'39.15"S, 50°9'24"W, 05.I.2014, Nascimento, E.A. col. (UECO); 1♂, Ponta Grossa, Parque Nacional dos Campos Gerais, Morro do Castelo, 25°6'13.90"S, 49°56'36.38"W, 15.I.2014, Nascimento, E.A. & eq. col. (UECO); 1♂, 1♀, Ponta Grossa, em copula [in copula], 12.55, M. Vilella col. (DZUP); Rio Grande do Sul: 1♂, 1♀, Caxias do Sul, Vila Oliva, in copula, 19.2.49 (MAPA); 1♂, Esmeralda, 12.XII.1978, C. J. Becker leg. (MCZ).

*Costalampys delicata*. Holotype: BRAZIL: Rio de Janeiro: 1♂, Teresópolis, P.N. Serra dos Órgãos, Malaise trap, PVE9B (22°26'57.8"S, 43°0'13.7"W, 1,236 m), I.2016, L. Silveira col. (DZRJ). Paratypes: BRAZIL: Rio de Janeiro: 1♂, Paraty, P.N. Serra da Bocaina, Estr. Paraty-Cunha, 1514 m, 23.I.2010, Mattos, I. & Mermudes col. (DZRJ); 1♀, Teresópolis, P.N. Serra dos Órgãos, Trilha da Pedra do Sino, Cach. Veu da Noiva, 29–31.I.2014, active search [morning ~10am], L. Silveira col. (DZRJ); 1♀, P.N. Serra dos Órgãos, I.2014, PENSARIOP2 (22°26'48"S, 43°00'42.6"W, 1050 m), 1♂, Malaise trap, R. Monteiro col. (DZRJ); Teresópolis, P.N. Serra dos Órgãos, Represa Beija-Flor, 14–17.I.2015, active search [afternoon ~3pm], L. Silveira col. (DZRJ); 1♂, P.N. Serra dos Órgãos, Malaise trap, PVE7B (22°27'24.8"S, 42°59'7.2"W, 952 m), I.2015, L. Silveira col. (DZRJ); 1♂, 2♀, PVE9A (22°26'55.1"S, 43°00'16.4"W, 1246 m), XII.2015, Silveira & Khattar col. (DZRJ); 1♀, Teresópolis, P.N. Serra dos Órgãos, I.1969, Porter & Garcia col. (DZUP).

*Costalampys klugii*. Holotype: BRAZIL: 1♂, Without other data (ZIN). Other material examined: BRAZIL: 2 males and 2♀, Without other data, #31532 (ZMB); Santa Catarina: 1♂, Seara [Nova Teutonia], XII.1935, B. Pohl. col (MZSP).

*Cladodes flabellatus*. **Chile**. Without other provenance data. 1 Male. (BMNH);

*Dadophora hyalina*. **Brazil**. Without other provenance data. 1 Male. (BMNH);

*Dilychnia guttula*. **Brazil**. Amazonas. São Paulo Olivença, 10.VIII.1925, 1 female and 1 male, H.L. Boy (MNRJ).

*Ethra marginata*. **Brazil**. Rio de Janeiro. Teresópolis, without date, 1 male (DZRJ).

*Lucidota banoni*. **French Guiana**. Without other provenance data, 1 male, 1 female (DZRJ).

*Luciuranus josephi*. **PARATYPES. Brazil**. Rio de Janeiro. Teresópolis, Serra dos Órgãos N. P., 1961m, VIII.2014, 1 male and 1 female, L. Silveira e G. Khattar col. (DZRJ).

*Scissicauda disjuncta*. **Brazil**. Rio de Janeiro. Teresópolis, Serra dos Órgãos N. P., 1050m, XII/2013, Malaise trap, 1 male and 1 female, R. Monteiro col. (DZRJ)

*Scissicauda balena*. **HOLOTYPE. Brazil.** *Espírito Santo*, 1 male, Descourtils col., coll. Fry (BMNH).

**PARATYPE.** Idem, 1 female. (BMNH).

*Uanauna angaporan*. **PARATYPES. Brazil.** *Rio de Janeiro*, Itaguaí, Parque Estadual Cunhambebe, 22° 50'

53.4" S 43° 54' 29.3" W, 150m, IX.2011, 1 male L. Silveira, Clarkson Sampaio & Ferreira-Jr col. (DZRJ);

Angra dos Reis, Parque Estadual da Ilha Grande (PEIG), approx. 23° 10' 30.4" S 44° 11' 11.3" W, IX.2008, 2 females, Projeto Coleoptera [J. Mermudes] col. (MNRJ).

*Ybytyramoan praeclarum*. **PARATYPE. Brazil.** *Rio de Janeiro*, Teresópolis, P.N. Serra dos Órgãos, Pedra do Sino, Abrigo 4, 23.IX.2011, 1 male, N.C., C.L., J.C., Manuella Folly col. (DZRJ).

#### **Incertae sedis**

*Araucariocladus hiems*. **PARATYPE. Brazil.** *Rio de Janeiro*. Teresópolis, Parque Nacional da Serra dos

Órgãos, VI.2013, S 22° 27' 34.6", W 43° 01' 40.2", 1824m, R. Monteiro col., 1 male (DZRJ).
